# Supplementary material for: Nuclear Receptor-Like Structure and Interaction of Congenital Heart Disease-Associated Factors GATA4 and NKX2-5
Source: PLoS One. 2015 Dec 7;10(12):e0144145. doi: 10.1371/journal.pone.0144145 (PMC4671672; doi:10.1371/journal.pone.0144145)
Supplement: S2 File — (XLSX) [file pone.0144145.s002.xlsx]

## Sheet: GATApromoter_1
NP-81							NP-112
LAR II							LAR II
19.51	74.24	32.07	38.52	53.89	92.59		46.61	344.6	64.72	90.43	96.39	179
55.31	50.63	37.13	26.75	53.27	84.92		43.59	206	74.49	89.7	66.51	161
139.1	112.3	79.54	49.36	50.65	0.462		192.2	192.6	307.8	177.4	92.96	0.285
93.78	56.52	58.78	37.71	27.86	0.294		290.9	196	329	217.5	115.5	0.339
114.2	64.31	54.25	85.14	50.42			442.5	111.7	263	420.6	111.5
100.7	54.67	55.44	82.77	57.71			370.4	47.93	270.9	409	144.6
68.97	30.21	31.71	68.72	67.98			295.8	96.89	37.75	493.2	339.9
59.75	25.68	27.62	77.72	54.57			254	78.66	26.89	260.6	243
Stop n glow							Stop n glow
3.45	3.195	4.736	5.776	7.057	5.341		4.97	4.204	3.547	4.7	5.3	3.53
3.824	3.215	7.066	6.243	6.476	5.097		7.13	3.799	4.029	5.504	3.805	2.501
3.668	4.37	4.715	3.85	4.539	0.232		4.107	3.545	5.326	4.122	3.045	0.237
2.582	19.46	4.292	3.712	3.898	0.211		3.721	3.322	5.241	4.366	4.174	0.258
2.319	4.919	3.832	10.35	4.001			4.347	1.428	4.991	4.911	2.489
1.96	3.481	4.16	4.487	3.979			3.697	1.319	3.954	4.352	1.977
1.566	4.298	4.939	3.366	5.41			7.901	4.294	2.548	4.642	5.676
1.658	3.544	5.383	4.457	4.424			4.284	4.202	2.751	4.129	5.01
pMT2	R264A 1,5x	N272D 2x	R283Q 1,5x	K299A 2,5x	S327A 1,5x		pMT2	R264A 1,5x	N272D 2x	R283Q 1,5x	K299A 2,5x	S327A 1,5x
pMT2	R264A 1,5x	N272D 2x	R283Q 1,5x	K299A 2,5x	S327A 1,5x		pMT2	R264A 1,5x	N272D 2x	R283Q 1,5x	K299A 2,5x	S327A 1,5x
wtGATA4	S269C	Q274H	E288G 1,2x	R319C 1,5x	Background		wtGATA4	S269C	Q274H	E288G 1,2x	R319C 1,5x	Background
wtGATA4	S269C	Q274H	E288G 1,2x	R319C 1,5x	Background		wtGATA4	S269C	Q274H	E288G 1,2x	R319C 1,5x	Background
V217Y	A271V	S269C+Q274H	E288K	R319S 1,5x			V217Y	A271V	S269C+Q274H	E288K	R319S 1,5x
V217Y	A271V	S269C+Q274H	E288K	R319S 1,5x			V217Y	A271V	S269C+Q274H	E288K	R319S 1,5x
H234S	N272S 1,5x	R283A	M298Y 1,5x	P321C 2,5x			H234S	N272S 1,5x	R283A	M298Y 1,5x	P321C 2,5x
H234S	N272S 1,5x	R283A	M298Y 1,5x	P321C 2,5x			H234S	N272S 1,5x	R283A	M298Y 1,5x	P321C 2,5x

## Sheet: GATApromoter_2
NP-81							NP-112
LAR II							LAR II
17.89	64.09	23.61	21.9	44.92	39.39		11.04	284.5	69.37	37.84	82.7	180.8
17.05	55.19	23.3	25.08	36.93	35.28		19.16	290.7	59.89	46.74	83.35	139.5
51.89	46.7	66.45	30.24	23.01	0.463		205.6	210	211.4	118	74.81	0.517
55.56	38.71	57.14	29.64	21.56	0.429		207.4	180.6	244	119.5	64.22	0.447
60.41	52.8	70.93	48.26	42.22			302.2	186.8	238.4	192.4	124.1
37.1	48.28	71.74	35.98	36.48			276.4	197.8	190.7	128.5	122.2
79.17	27.46	22.7	84.11	33.17			404.3	66.87	47.06	359.6	137.3
76.31	21.75	22.57	73.21	41.77			346.9	77.22	50.29	281.4	148.9
Stop n glow							Stop n glow
1.874	3.039	4.339	4.173	6.874	4.28		2.188	5.117	4.804	3.857	6.128	87.23
1.821	3.033	3.542	4.299	5.794	3.623		3.225	5.826	4.236	3.821	7.16	4.193
1.631	2.737	4.277	3.899	3.456	0.206		4.283	3.517	3.485	3.825	3.461	0.242
1.565	2.491	4.093	3.958	3.442	0.227		4.104	3.983	4.261	4.023	3.287	0.224
1.479	3.561	4.797	3.199	3.483			4.119	3.361	4.177	3.191	3.495
1.546	2.882	4.568	3.127	3.449			7.427	4.33	4.515	2.907	4.02
1.732	3.27	9.106	5.095	4.067			4.012	4.349	3.787	4.766	4.924
2.051	2.939	3.773	4.301	4.651			4.14	4.306	4.394	5.275	6.271
pMT2	R264A 1,5x	N272D 2x	R283Q 1,5x	K299A 2,5x	S327A 1,5x		pMT2	R264A 1,5x	N272D 2x	R283Q 1,5x	K299A 2,5x	S327A 1,5x
pMT2	R264A 1,5x	N272D 2x	R283Q 1,5x	K299A 2,5x	S327A 1,5x		pMT2	R264A 1,5x	N272D 2x	R283Q 1,5x	K299A 2,5x	S327A 1,5x
wtGATA4	S269C	Q274H	E288G 1,2x	R319C 1,5x	Background		wtGATA4	S269C	Q274H	E288G 1,2x	R319C 1,5x	Background
wtGATA4	S269C	Q274H	E288G 1,2x	R319C 1,5x	Background		wtGATA4	S269C	Q274H	E288G 1,2x	R319C 1,5x	Background
V217Y	A271V	S269C+Q274H	E288K	R319S 1,5x			V217Y	A271V	S269C+Q274H	E288K	R319S 1,5x
V217Y	A271V	S269C+Q274H	E288K	R319S 1,5x			V217Y	A271V	S269C+Q274H	E288K	R319S 1,5x
H234S	N272S 1,5x	R283A	M298Y 1,5x	P321C 2,5x			H234S	N272S 1,5x	R283A	M298Y 1,5x	P321C 2,5x
H234S	N272S 1,5x	R283A	M298Y 1,5x	P321C 2,5x			H234S	N272S 1,5x	R283A	M298Y 1,5x	P321C 2,5x

## Sheet: GATApromoter_3
NP-81							NP-112
LAR II							LAR II
38.19	72.39	20.57	27.4	33.73	44.2		44.03	183.5	56.62	64.1	95.64	168.2
41.23	78.17	19.69	20.47	36.8	30.93		33	215.8	47.44	55.29	96.03	238
58.83	56.9	70.78	40.33	33.55	0.772		184.1	168.7	167.6	149.8	121.5	0.513
92.36	55.17	68.77	30.69	30.21	0.256		201.2	210.6	198.5	141.1	129	0.298
74.99	59.98	63.74	71.92	43.71			182	263.9	315.6	150.9	191
86.9	59.9	54.2	71.46	36.1			183.9	273.5	305.4	168.7	229.7
84.57	20.25	16.84	41.88	39.79			174.3	76.5	60.23	262.9	124.4
86.57	21.44	19.36	59.89	46.44			184.3	58.64	55.87	371.7	98.44
Stop n glow							Stop n glow
2.619	2.417	4.035	4.777	6.375	3.715		5.344	3.57	3.819	4.287	5.083	4.312
2.421	3.671	3.908	4.398	7.435	2.733		4.991	7.28	3.937	3.954	6.153	4.971
1.725	3.025	5.371	3.976	4.661	0.255		4.027	3.974	3.572	4.883	5.153	0.121
2.712	3.325	4.825	4.316	4.253	0.233		4.235	4.85	3.923	5.341	6.271	0.123
1.79	4.001	4.359	4.617	3.957			3.935	5.876	5.991	3.853	5.25
2.006	4.575	5.29	4.73	4.059			3.22	6.159	6.351	4.628	6.469
1.893	3.467	3.824	4.033	4.632			3.465	5.09	4.423	5.536	3.975
2.166	3.101	4.288	4.075	4.59			3.416	3.657	4.462	6.21	4.178
pMT2	R264A 1,5x	N272D 2x	R283Q 1,5x	K299A 2,5x	S327A 1,5x		pMT2	R264A 1,5x	N272D 2x	R283Q 1,5x	K299A 2,5x	S327A 1,5x
pMT2	R264A 1,5x	N272D 2x	R283Q 1,5x	K299A 2,5x	S327A 1,5x		pMT2	R264A 1,5x	N272D 2x	R283Q 1,5x	K299A 2,5x	S327A 1,5x
wtGATA4	S269C	Q274H	E288G 1,2x	R319C 1,5x	Background		wtGATA4	S269C	Q274H	E288G 1,2x	R319C 1,5x	Background
wtGATA4	S269C	Q274H	E288G 1,2x	R319C 1,5x	Background		wtGATA4	S269C	Q274H	E288G 1,2x	R319C 1,5x	Background
V217Y	A271V	S269C+Q274H	E288K	R319S 1,5x			V217Y	A271V	S269C+Q274H	E288K	R319S 1,5x
V217Y	A271V	S269C+Q274H	E288K	R319S 1,5x			V217Y	A271V	S269C+Q274H	E288K	R319S 1,5x
H234S	N272S 1,5x	R283A	M298Y 1,5x	P321C 2,5x			H234S	N272S 1,5x	R283A	M298Y 1,5x	P321C 2,5x
H234S	N272S 1,5x	R283A	M298Y 1,5x	P321C 2,5x			H234S	N272S 1,5x	R283A	M298Y 1,5x	P321C 2,5x

## Sheet: NKXpromoter_1
p3xHA
LAR II
21.57	1146	695.5	1072	705.7	443
21.49	1041	776.1	975.2	1187	537.1
23.28	1053	262.8	535.3	637.4	769.3
38.16	1156	276.8	566.6	798	750.6
529.2	704.1	171.8	463.7	548.6	644.2
472.7	842.4	146.1	467.8	533.3	624.7
523.1	808.6	832.2	743.1	423.5	1324
537.8	712.9	831.8	913.7	695.6	1199
Stop n Glow
3.438	9.463	19.04	17.25	11.69	14.39
2.975	10.81	22.88	15.88	16.05	15.32
2.153	12.69	17.51	17.17	14.62	21.02
3.364	15.05	16.84	18.47	16.8	18.54
6.925	16.32	14.52	15.08	19.93	19.62
5.694	18.71	14.09	23.42	17.67	18.32
7.302	19.44	14.93	16.48	14.57	25.67
8.633	16.85	16.07	19.43	20.23	23.37
pMT2	V217Y	A271V	S269C+Q274H	E288K	R319S 1,5x
pMT2	V217Y	A271V	S269C+Q274H	E288K	R319S 1,5x
wtGATA4	H234S	N272S 1,5x	R283A	M298Y 1,5x	P321C 2,5x
wtGATA4	H234S	N272S 1,5x	R283A	M298Y 1,5x	P321C 2,5x
NKX2-5	R264A 1,5x	N272D 2x	R283Q 1,5x	K299A 2,5x	S327A 1,5x
NKX2-5	R264A 1,5x	N272D 2x	R283Q 1,5x	K299A 2,5x	S327A 1,5x
wtGATA4-NKX2-5	S269C	Q274H	E288G 1,2x	R319C 1,5x	wtGATA4-NKX2-5
wtGATA4-NKX2-5	S269C	Q274H	E288G 1,2x	R319C 1,5x	wtGATA4-NKX2-5

## Sheet: NKXpromoter_2
p3xHA
LAR II
14.66	848.3	811.9	784.9	949.8	750.6
18.93	934	1270	974.7	820.1	709.4
19.01	980	396	464.8	648.2	664.2
23.38	855.3	420.5	377.2	831.3	618.1
369	710.7	205.1	464.7	714.8	364.8
364.6	743.9	242	682.6	1039	360
676.8	804.7	666.6	733.5	571.6	1910
878	801.1	907.3	676	504.8	1212
Stop n Glow
8.157	13.54	16.68	14.24	16.21	18.59
9.188	14.24	20.52	15.96	16.27	21.76
5.387	14.21	16.07	16.66	16.1	44.36
5.844	12.36	16.32	13.5	18.47	17.24
11.54	15.62	15.98	18.06	24.65	16.5
10.53	14.72	17.14	20.44	28.55	17.15
12.06	14.01	12.56	18.6	21.46	30.5
12.6	12.98	16.18	19.18	20.09	25.67
pMT2	V217Y	A271V	S269C+Q274H	E288K	R319S 1,5x
pMT2	V217Y	A271V	S269C+Q274H	E288K	R319S 1,5x
wtGATA4	H234S	N272S 1,5x	R283A	M298Y 1,5x	P321C 2,5x
wtGATA4	H234S	N272S 1,5x	R283A	M298Y 1,5x	P321C 2,5x
NKX2-5	R264A 1,5x	N272D 2x	R283Q 1,5x	K299A 2,5x	S327A 1,5x
NKX2-5	R264A 1,5x	N272D 2x	R283Q 1,5x	K299A 2,5x	S327A 1,5x
wtGATA4-NKX2-5	S269C	Q274H	E288G 1,2x	R319C 1,5x	wtGATA4-NKX2-5
wtGATA4-NKX2-5	S269C	Q274H	E288G 1,2x	R319C 1,5x	wtGATA4-NKX2-5
